# Supplementary material
Source: Springer Nature journal article supplement (https://mijn.bsl.nl/resource/supplementary/13047_2013_577_MOESM1_ESM.pdf/7112494)

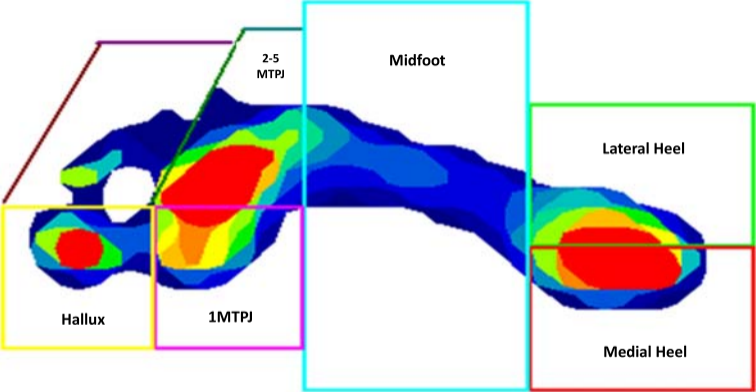

**mat barefoot walking**

Supplement: MOESM1 [file 7112494]
